# Supplementary material for: Neuronal NR4A1 deficiency drives complement-coordinated synaptic stripping by microglia in a mouse model of lupus
Source: PubMed Central journal article supplement (PMC8854434; doi:10.1038/s41392-021-00867-y), 2022-02-18

## Figure 1 l

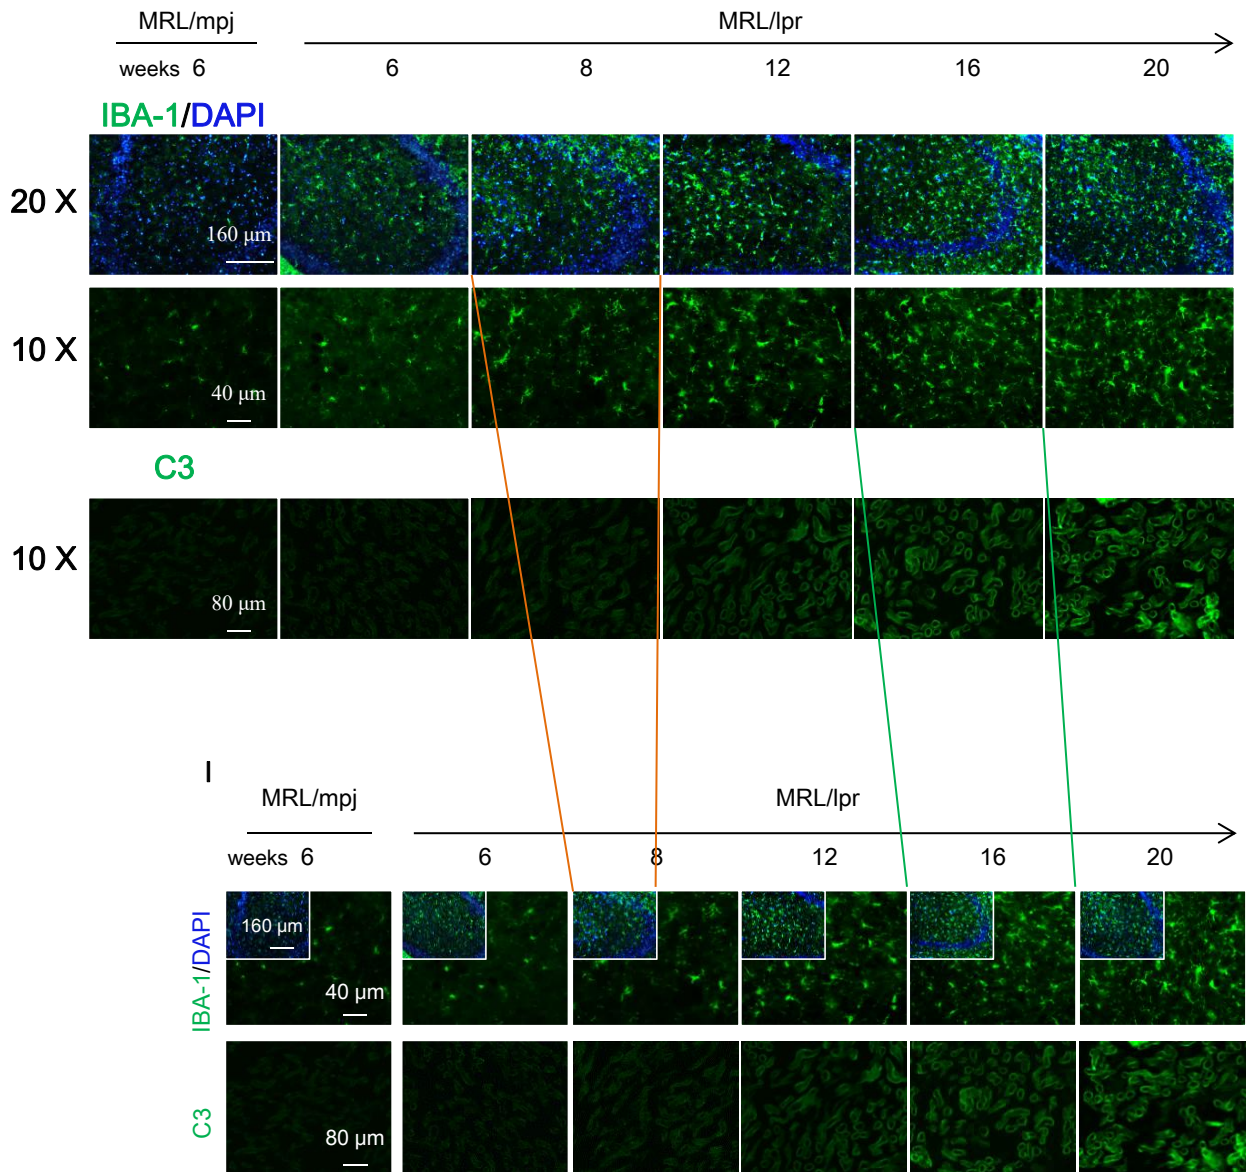

Figure 3a

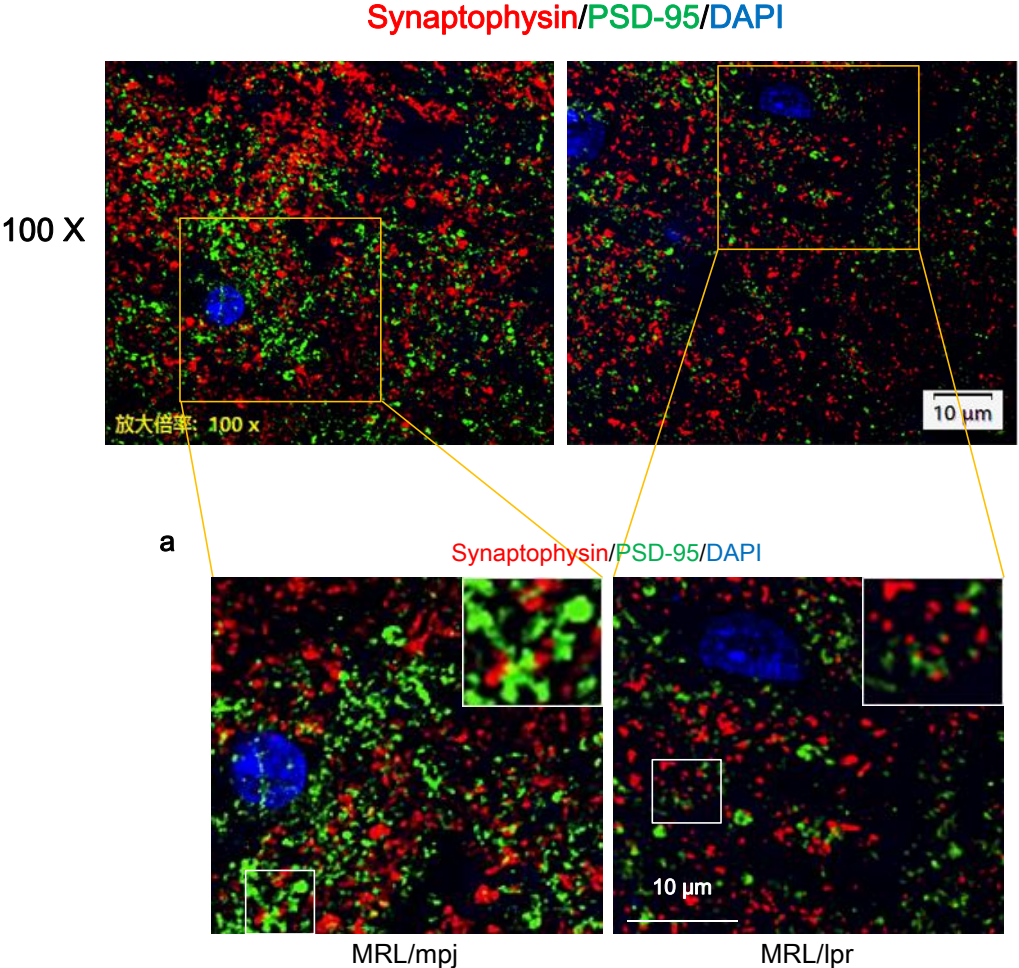

Figure 3c

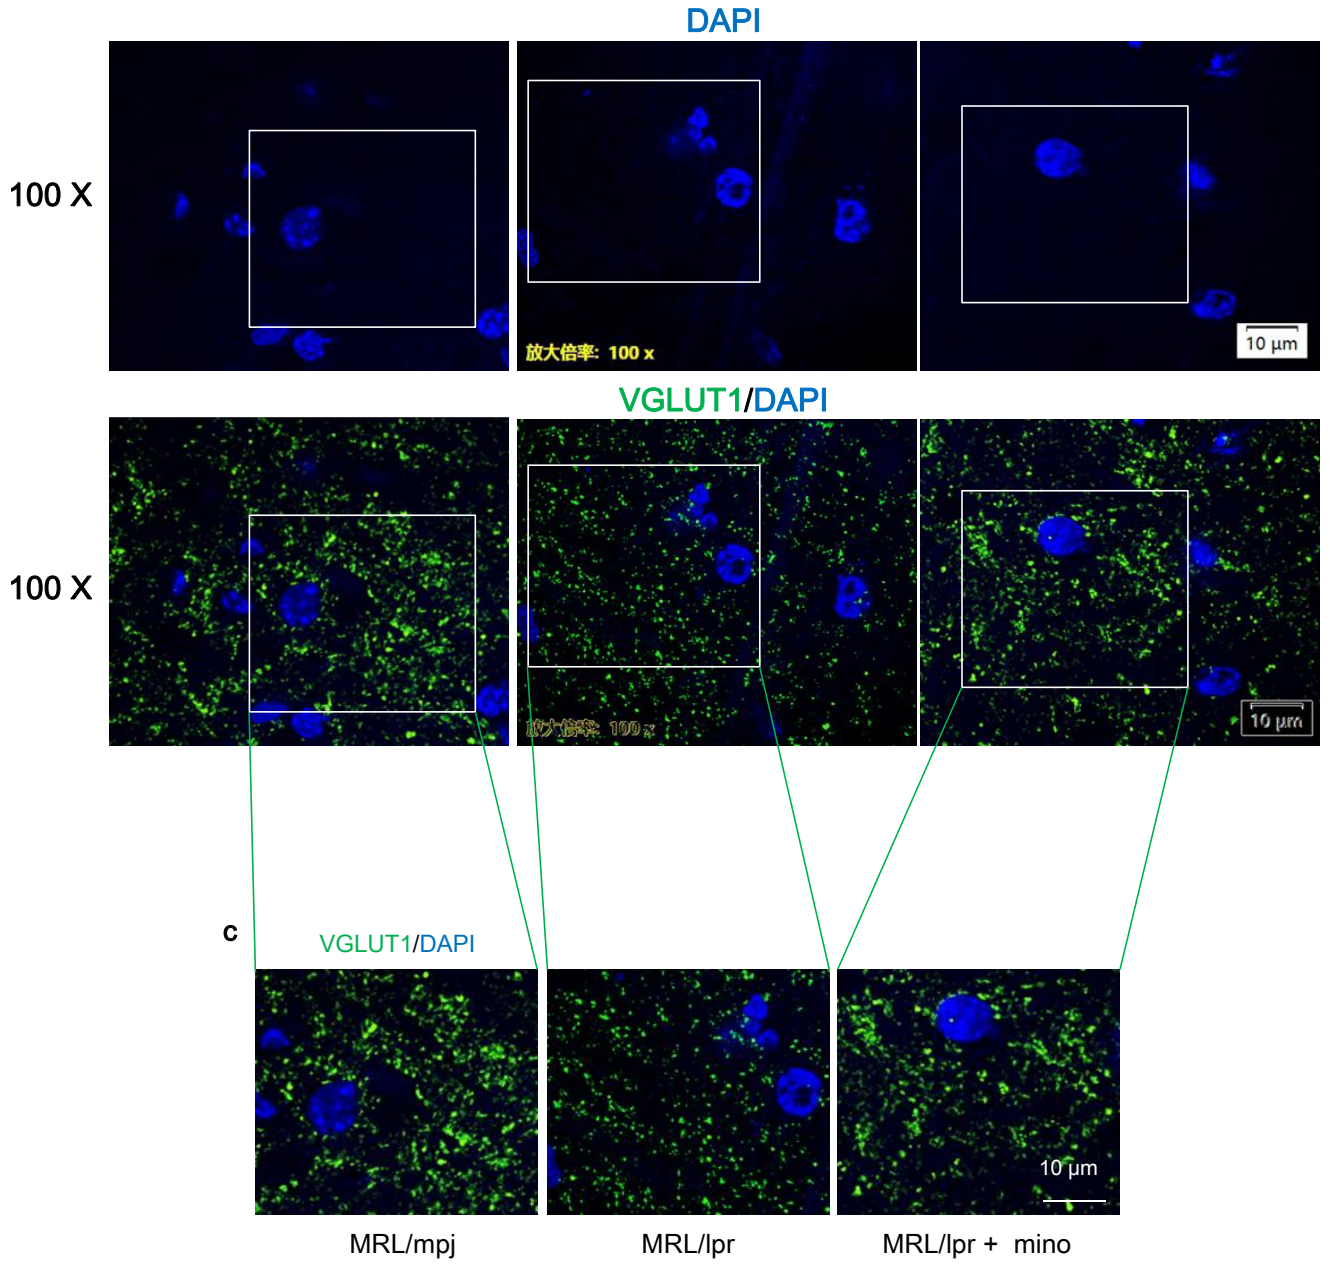

Figure 3g

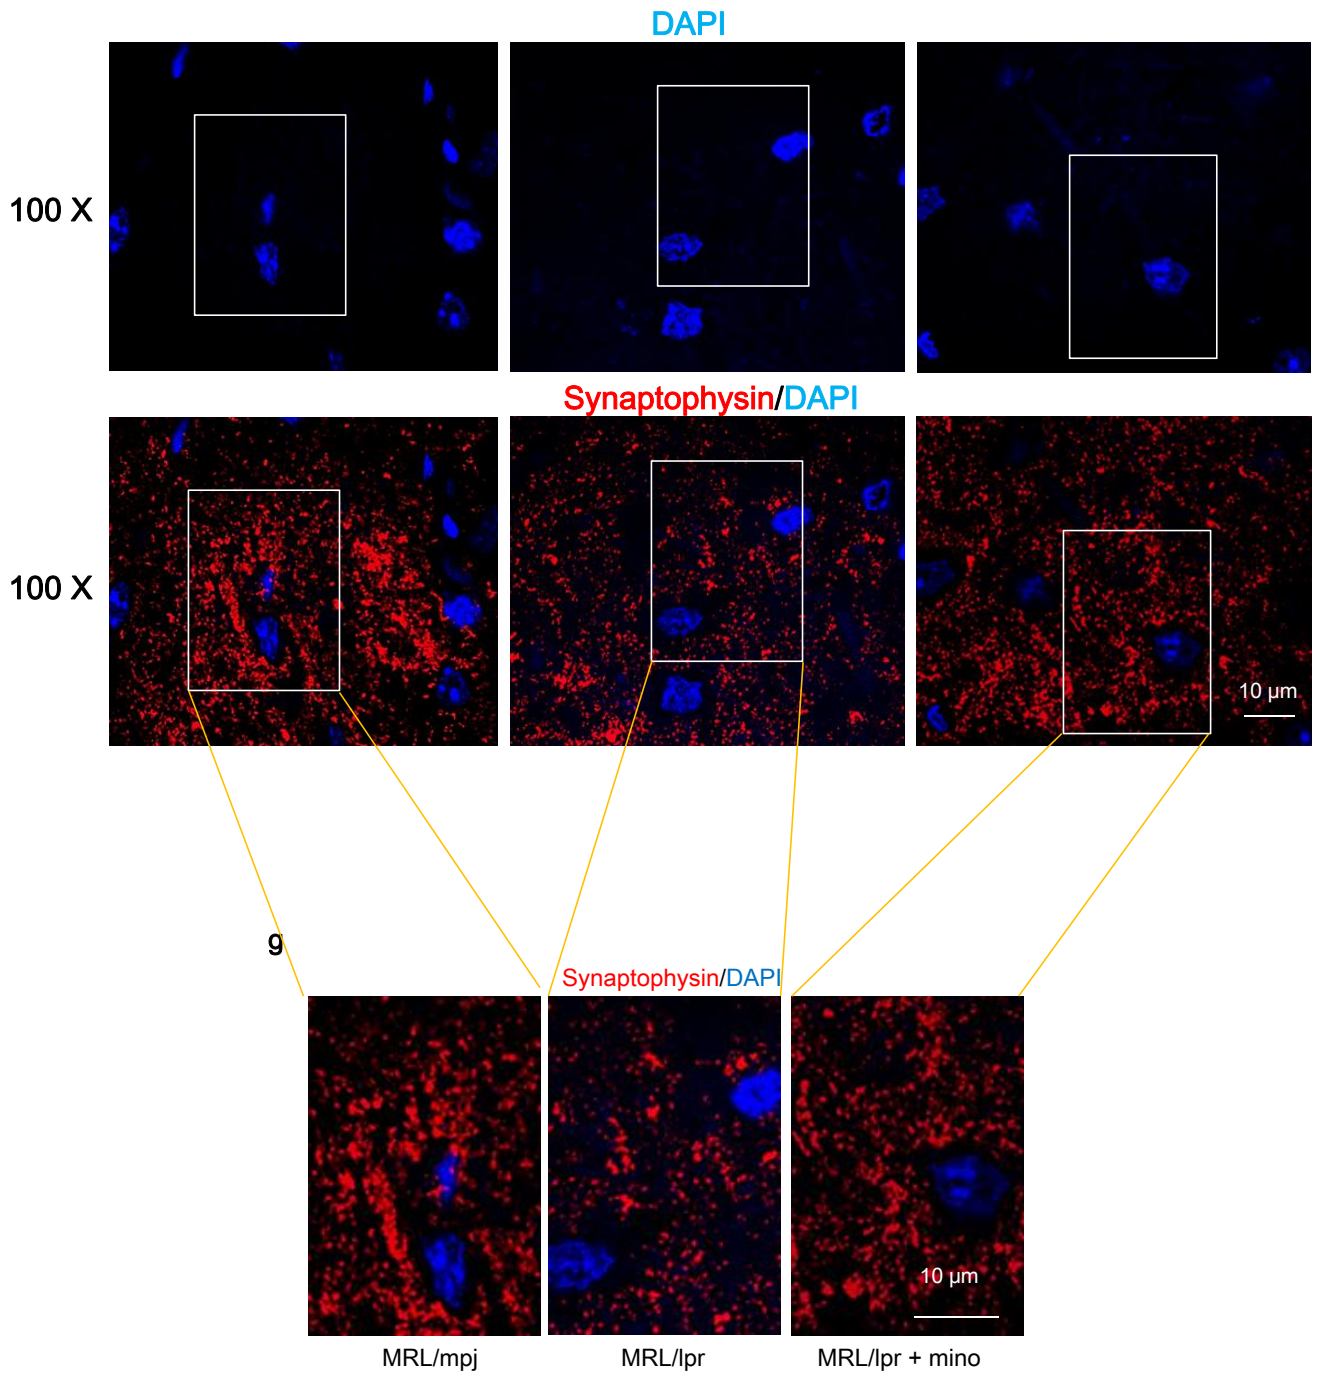

Figure 4b

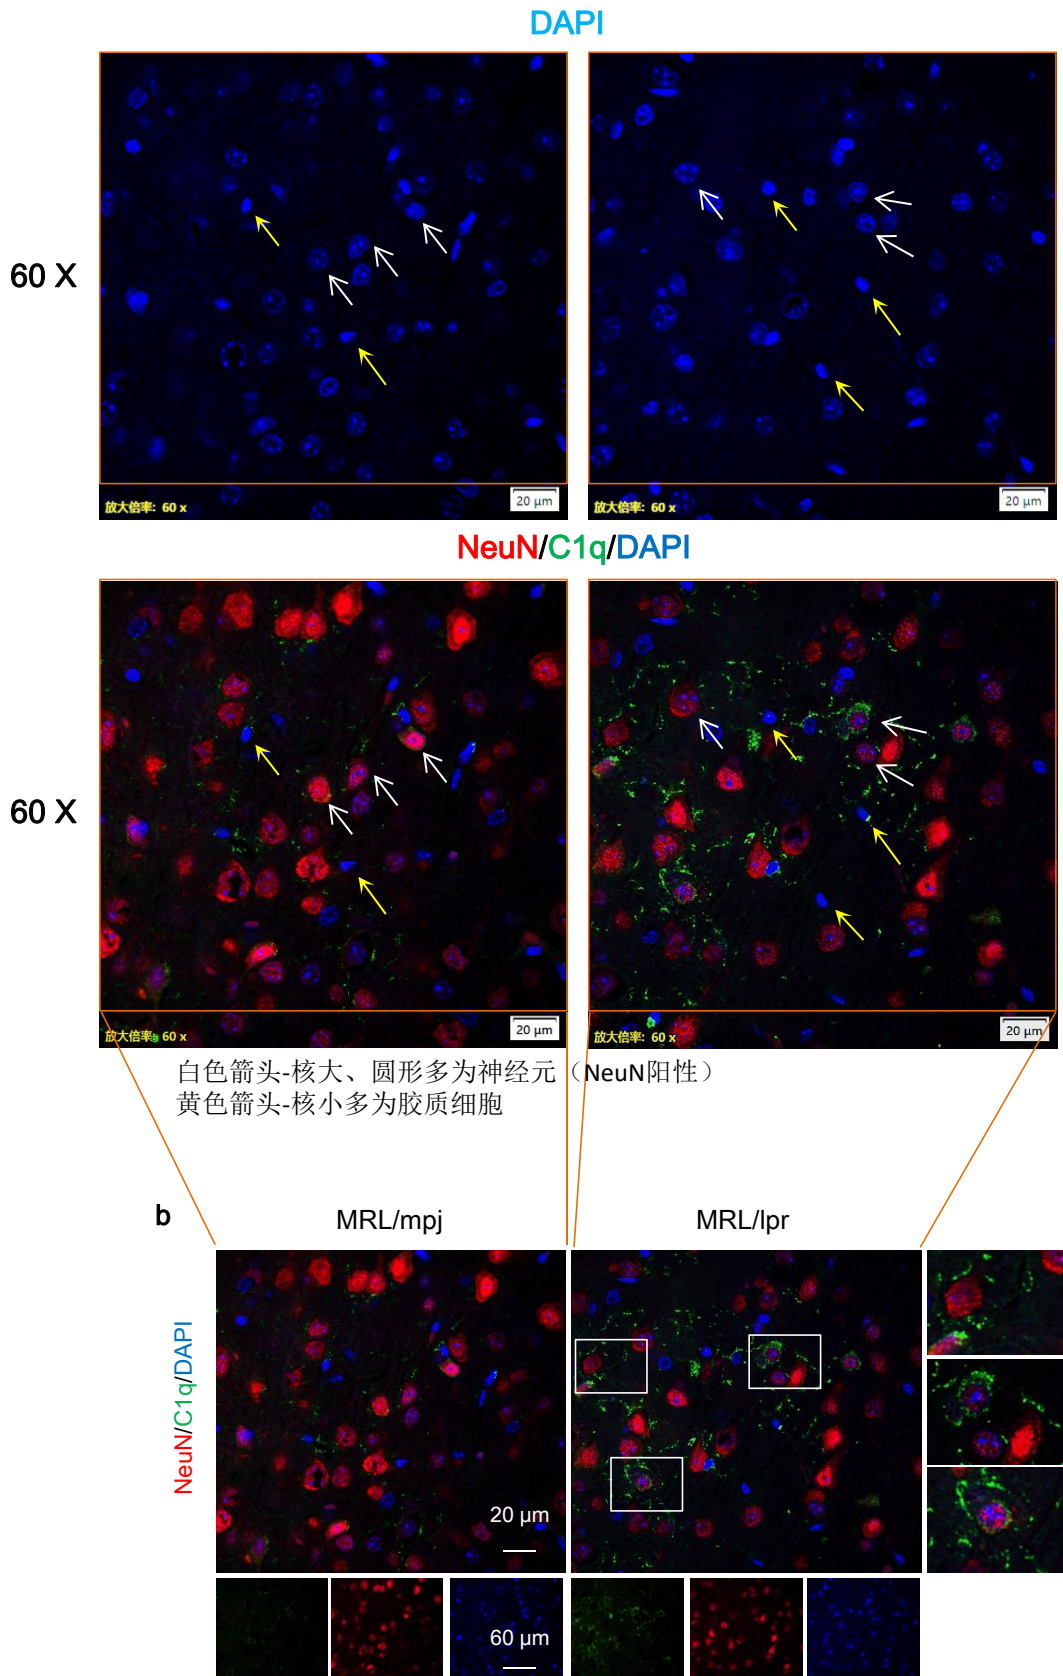

Figure 4c

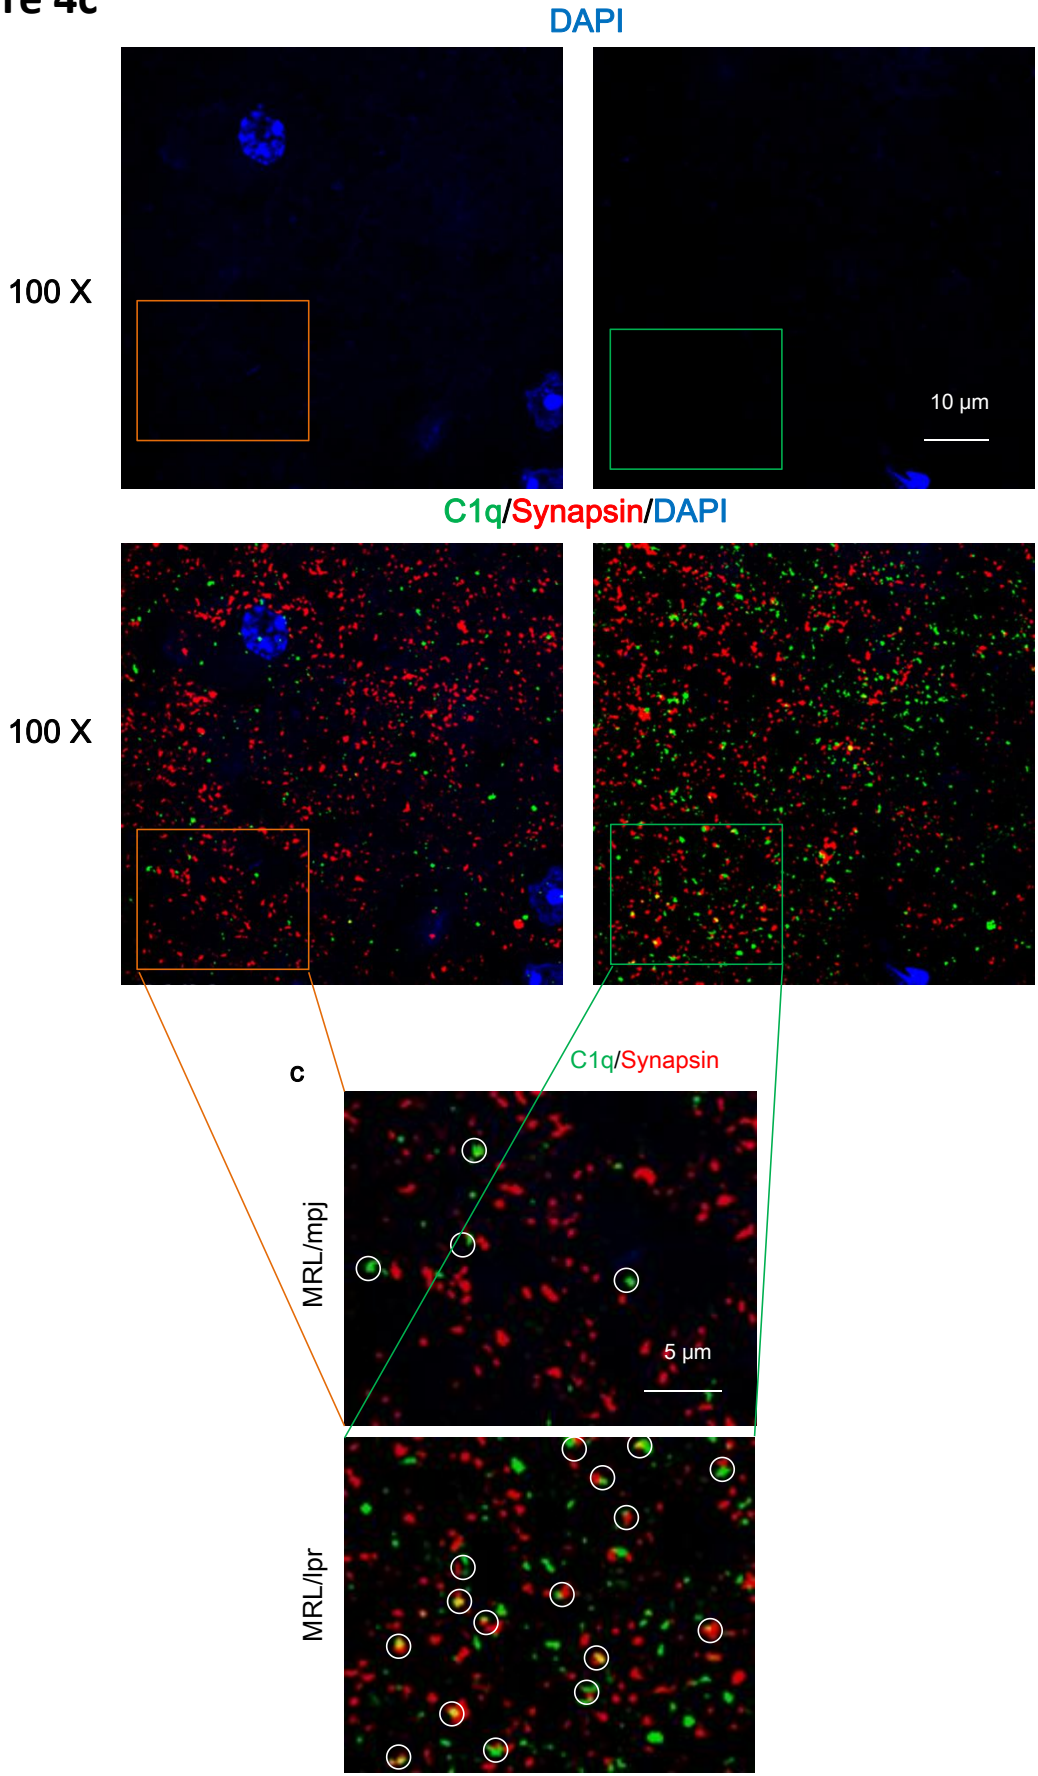

Figure 5a

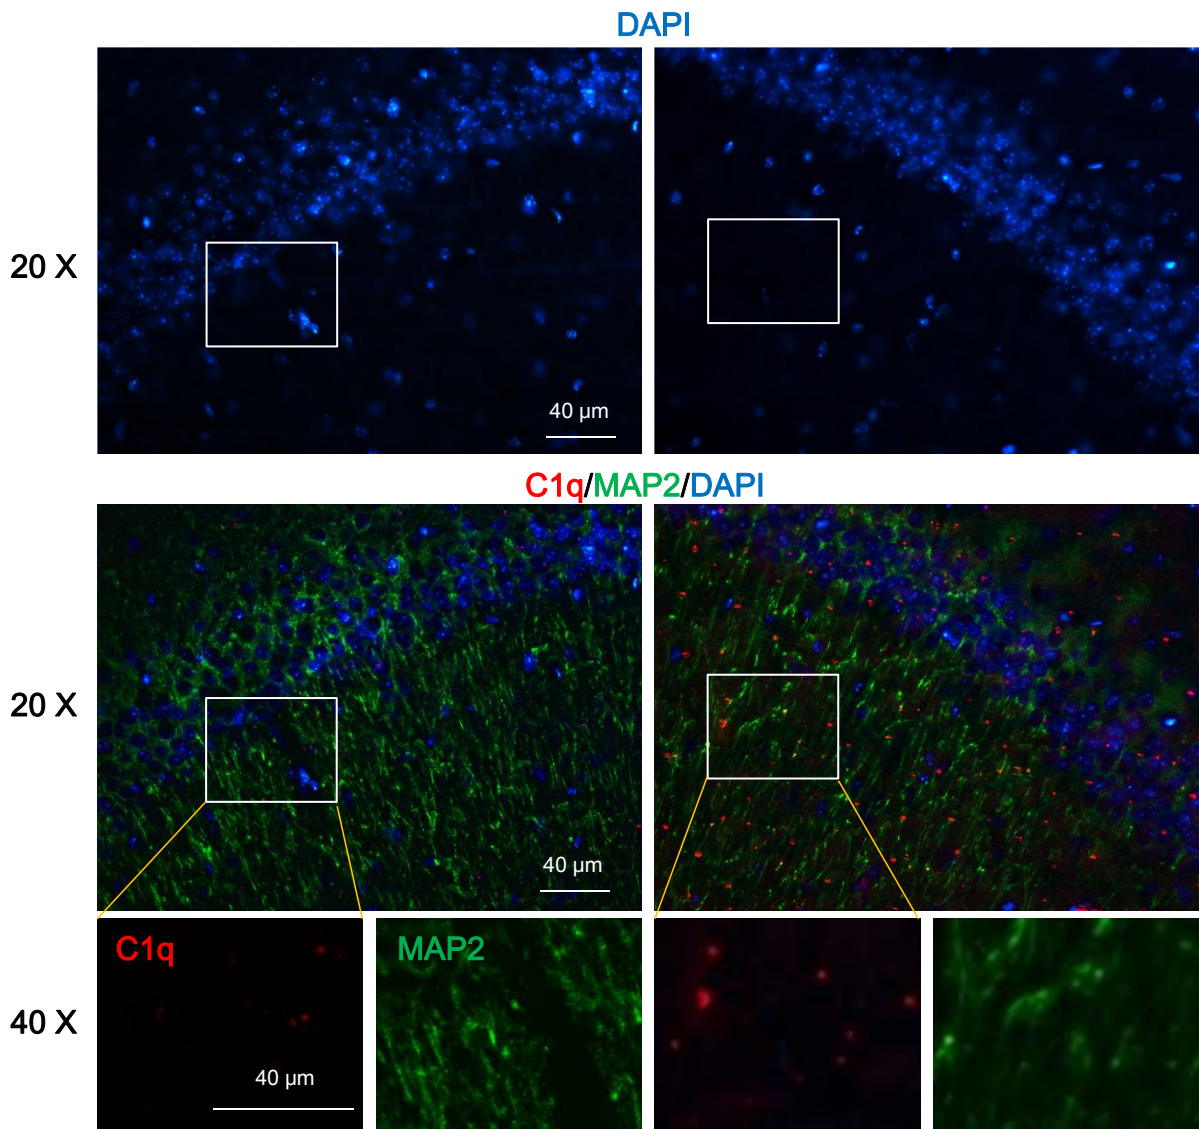

Fig5a

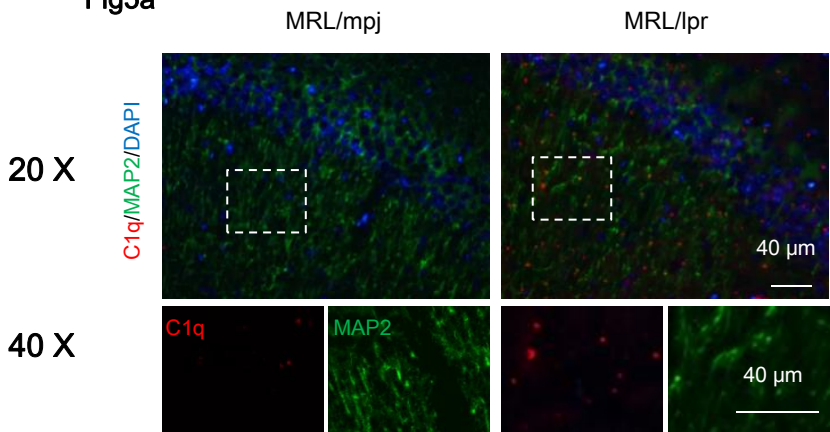

Figure 5b

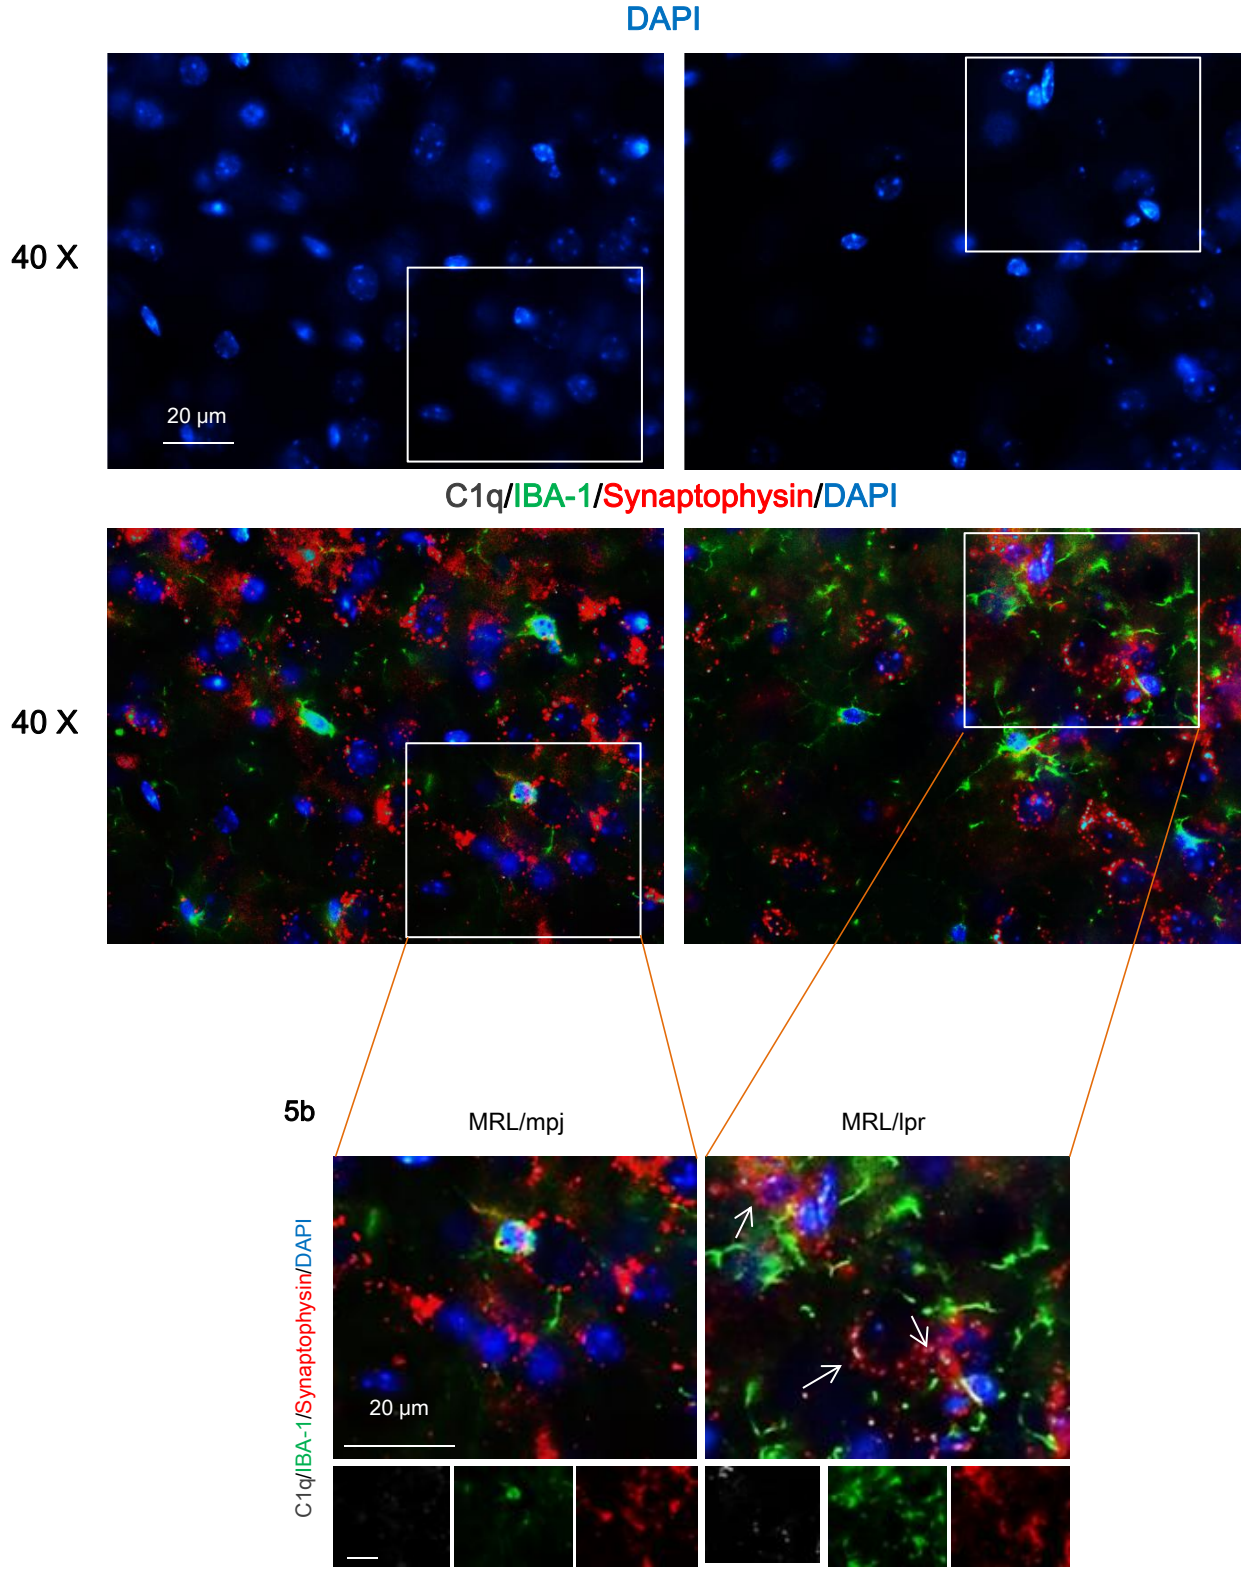



Figure 6e

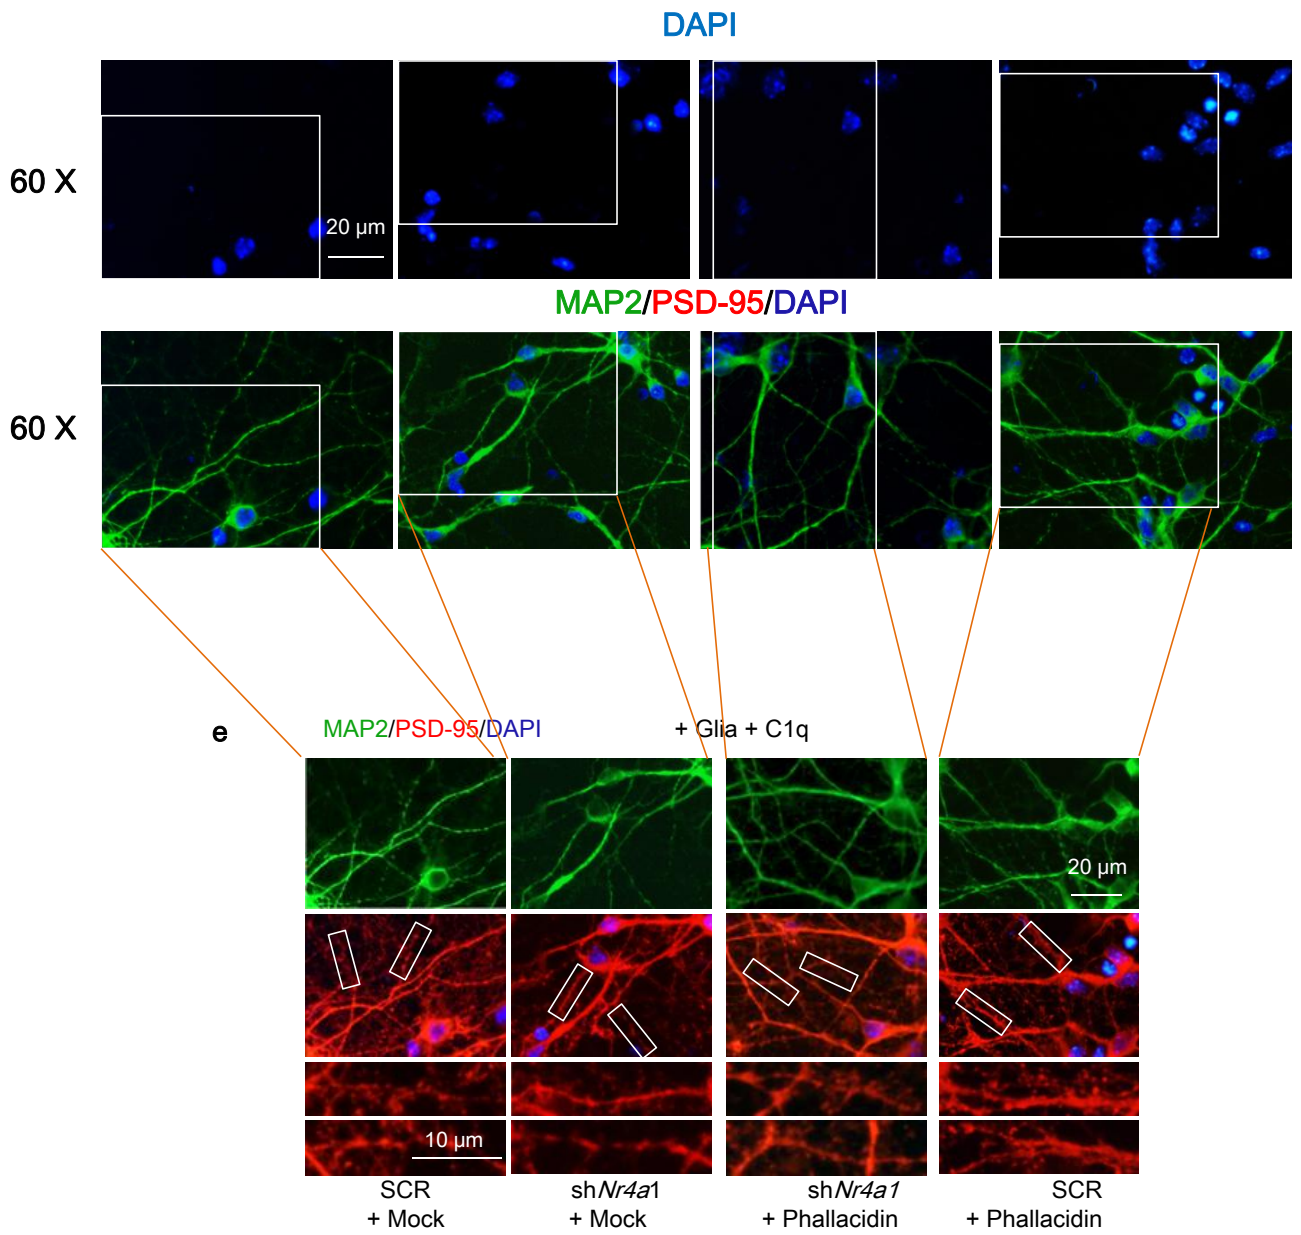

Figure 6g

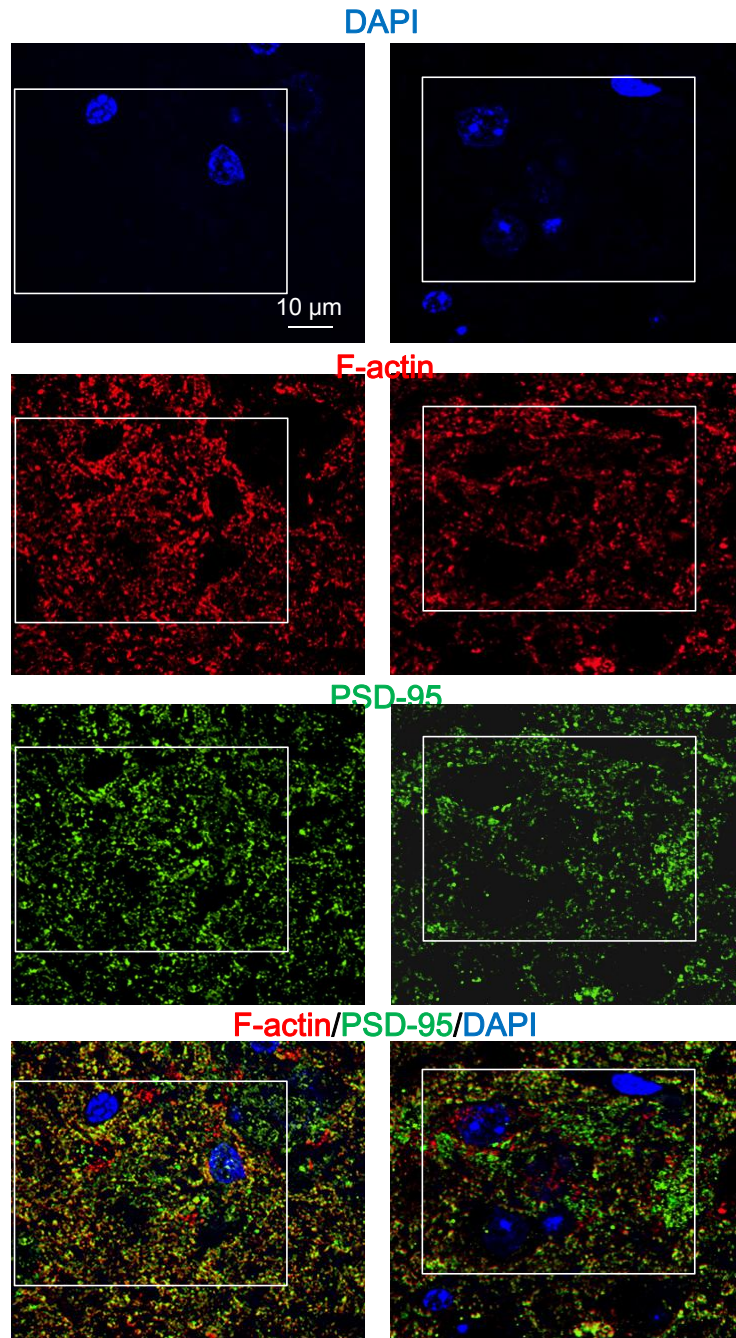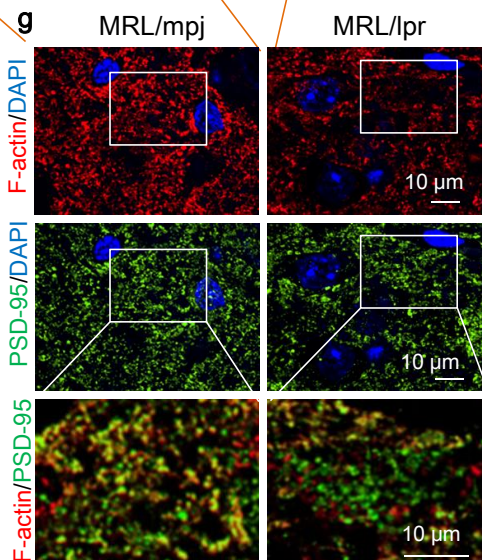

Figure 7d

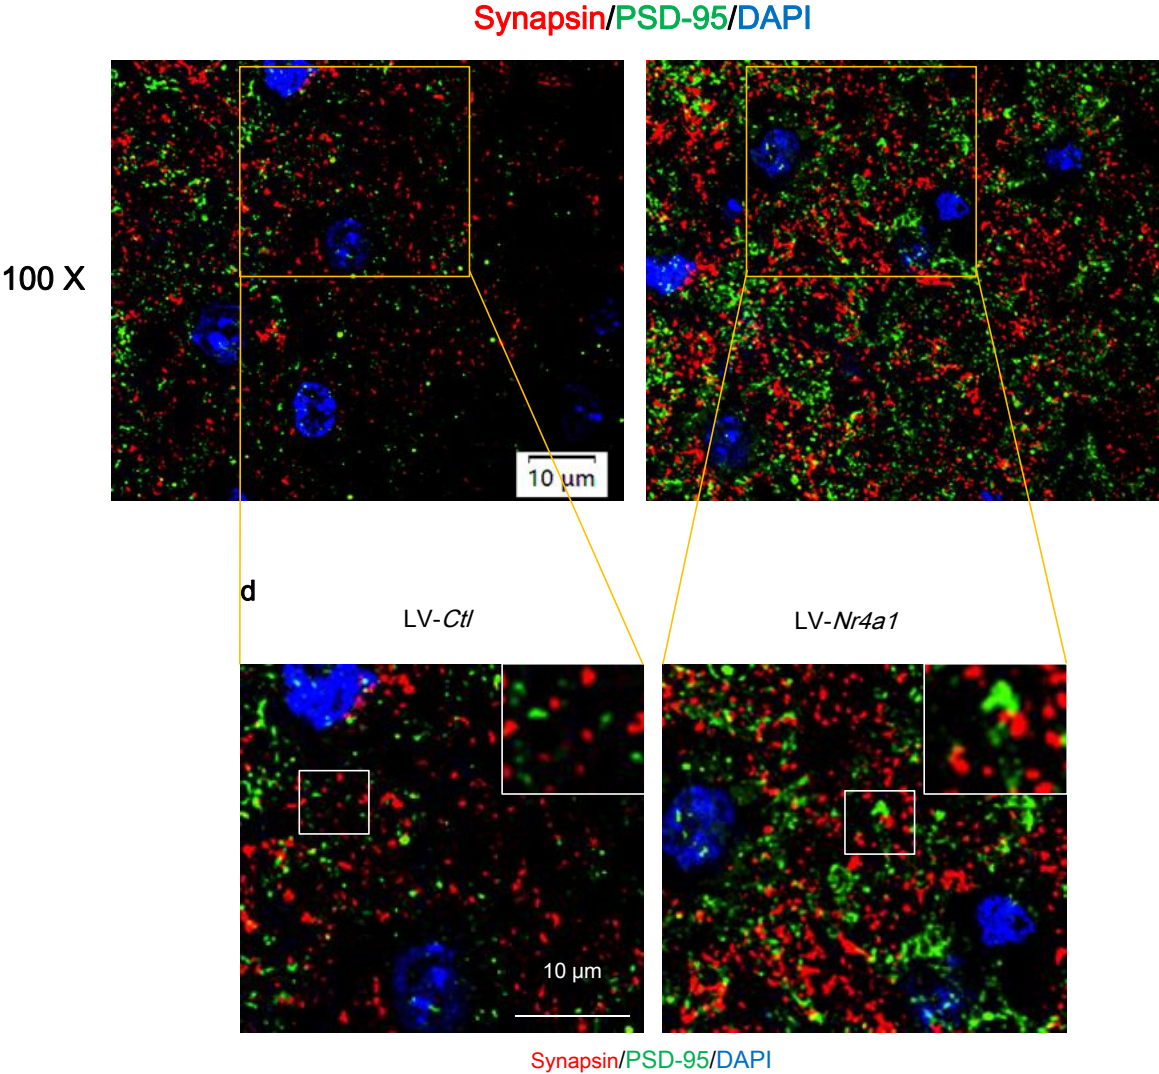

Figure S5a

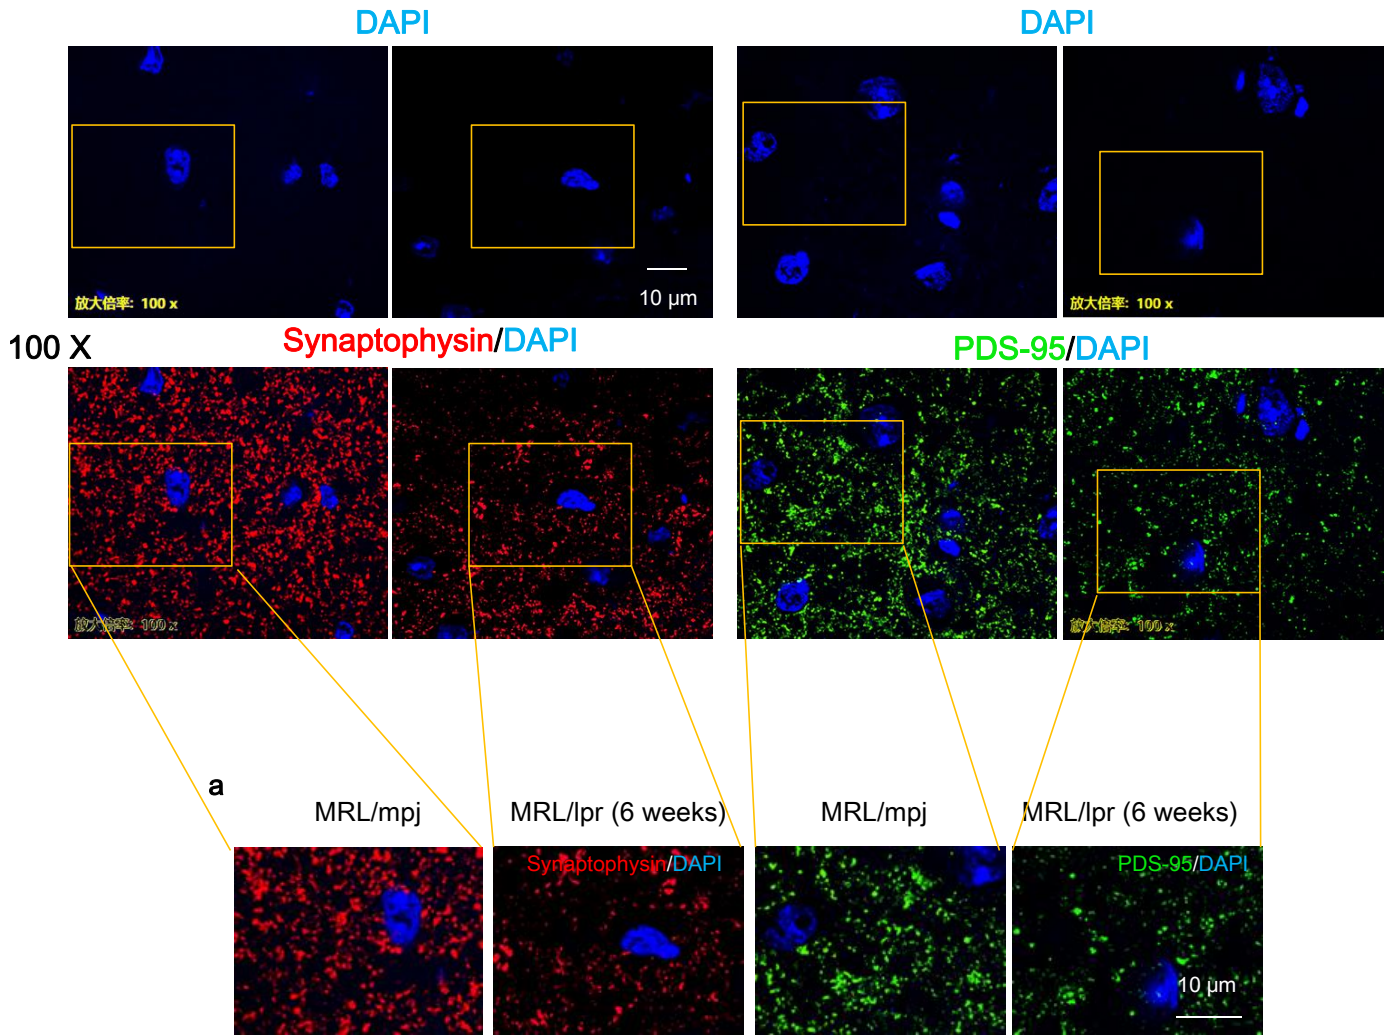

Figure S5b

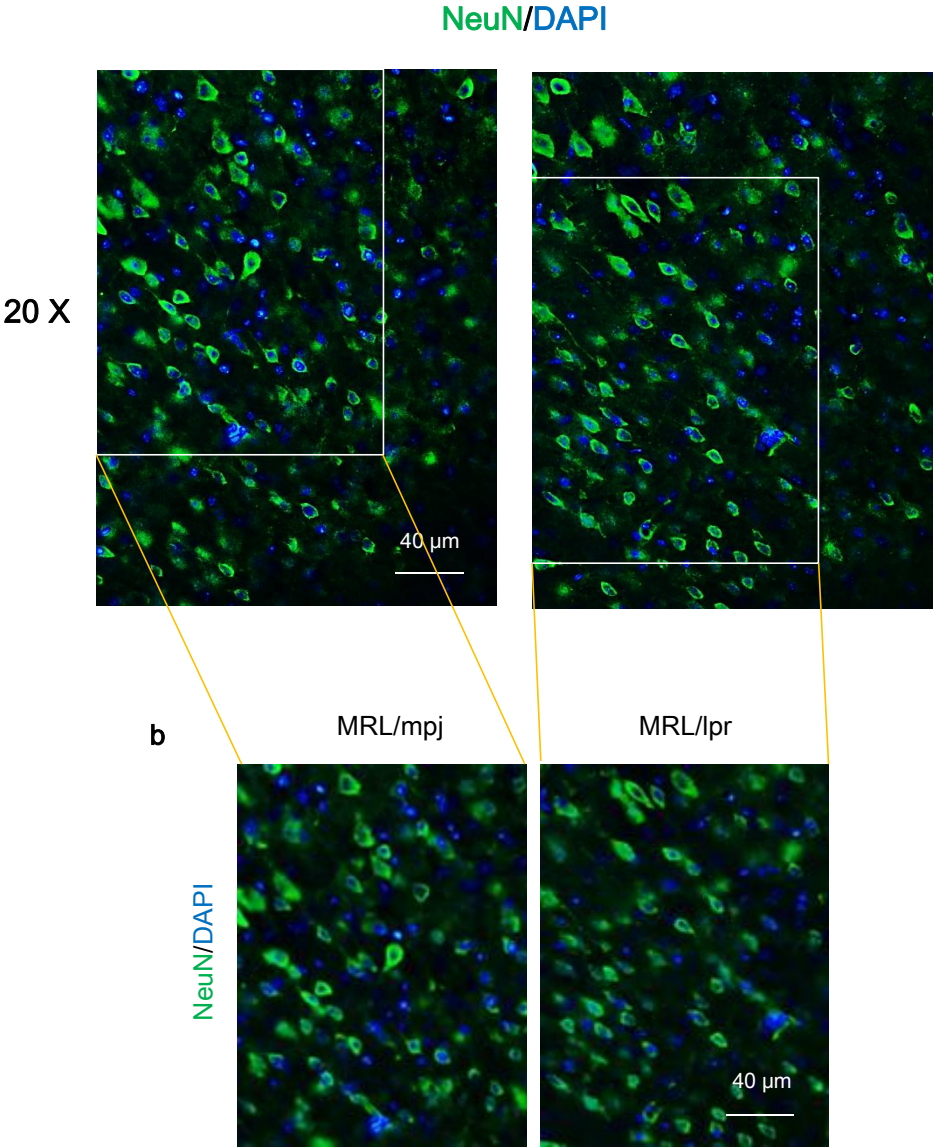

Figure S5c

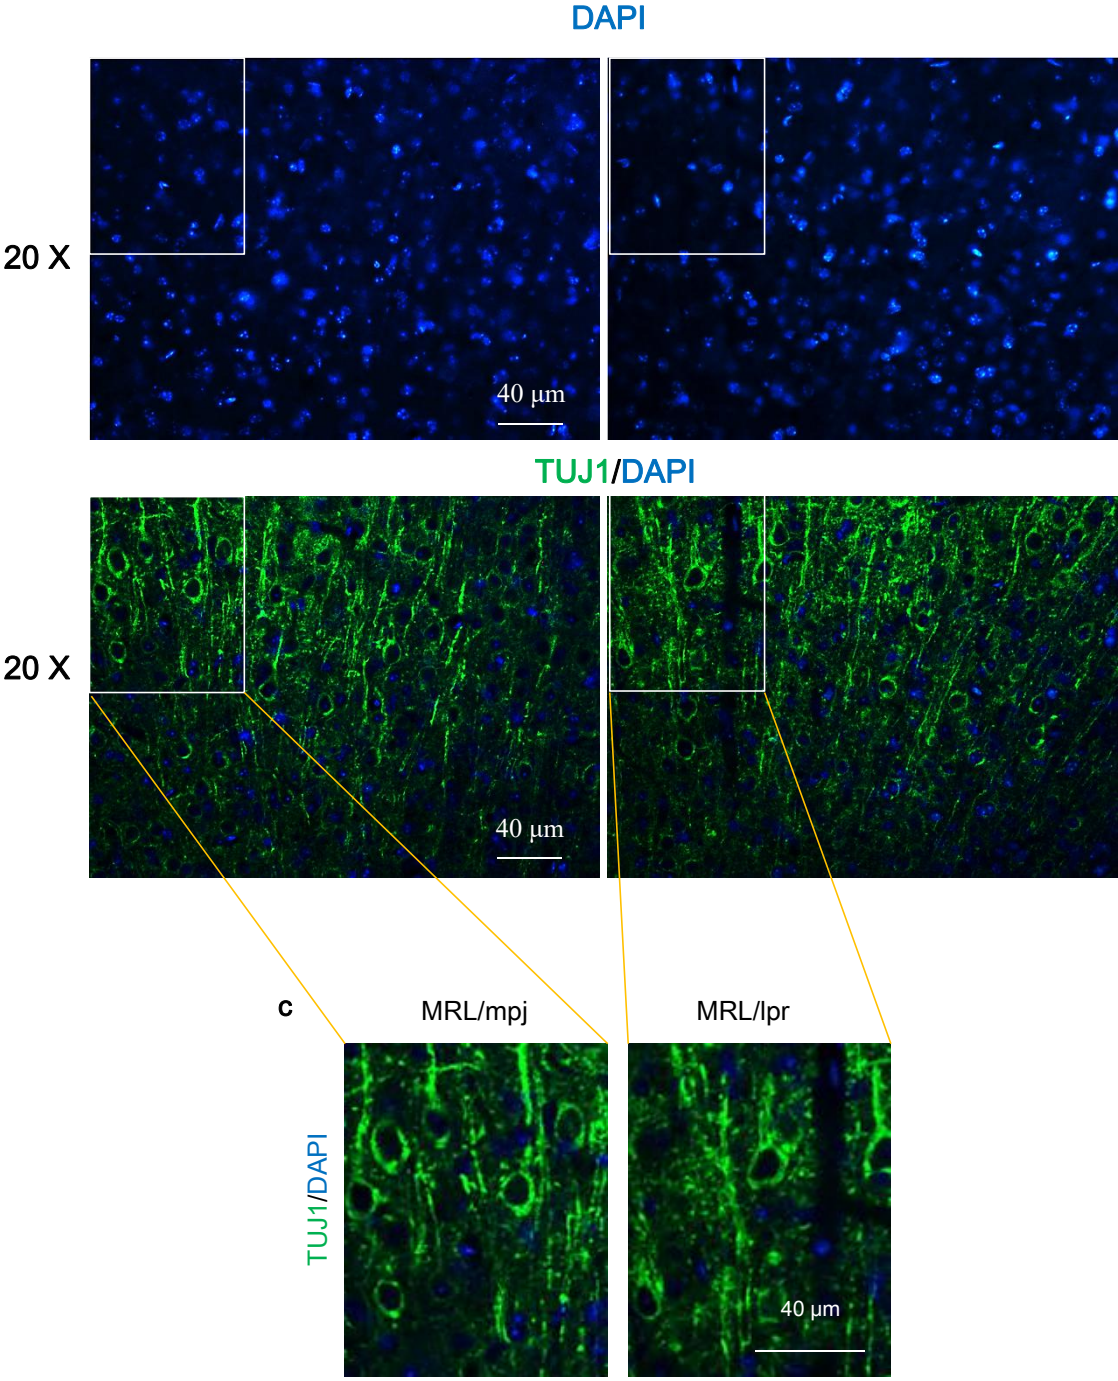

Figure S5d

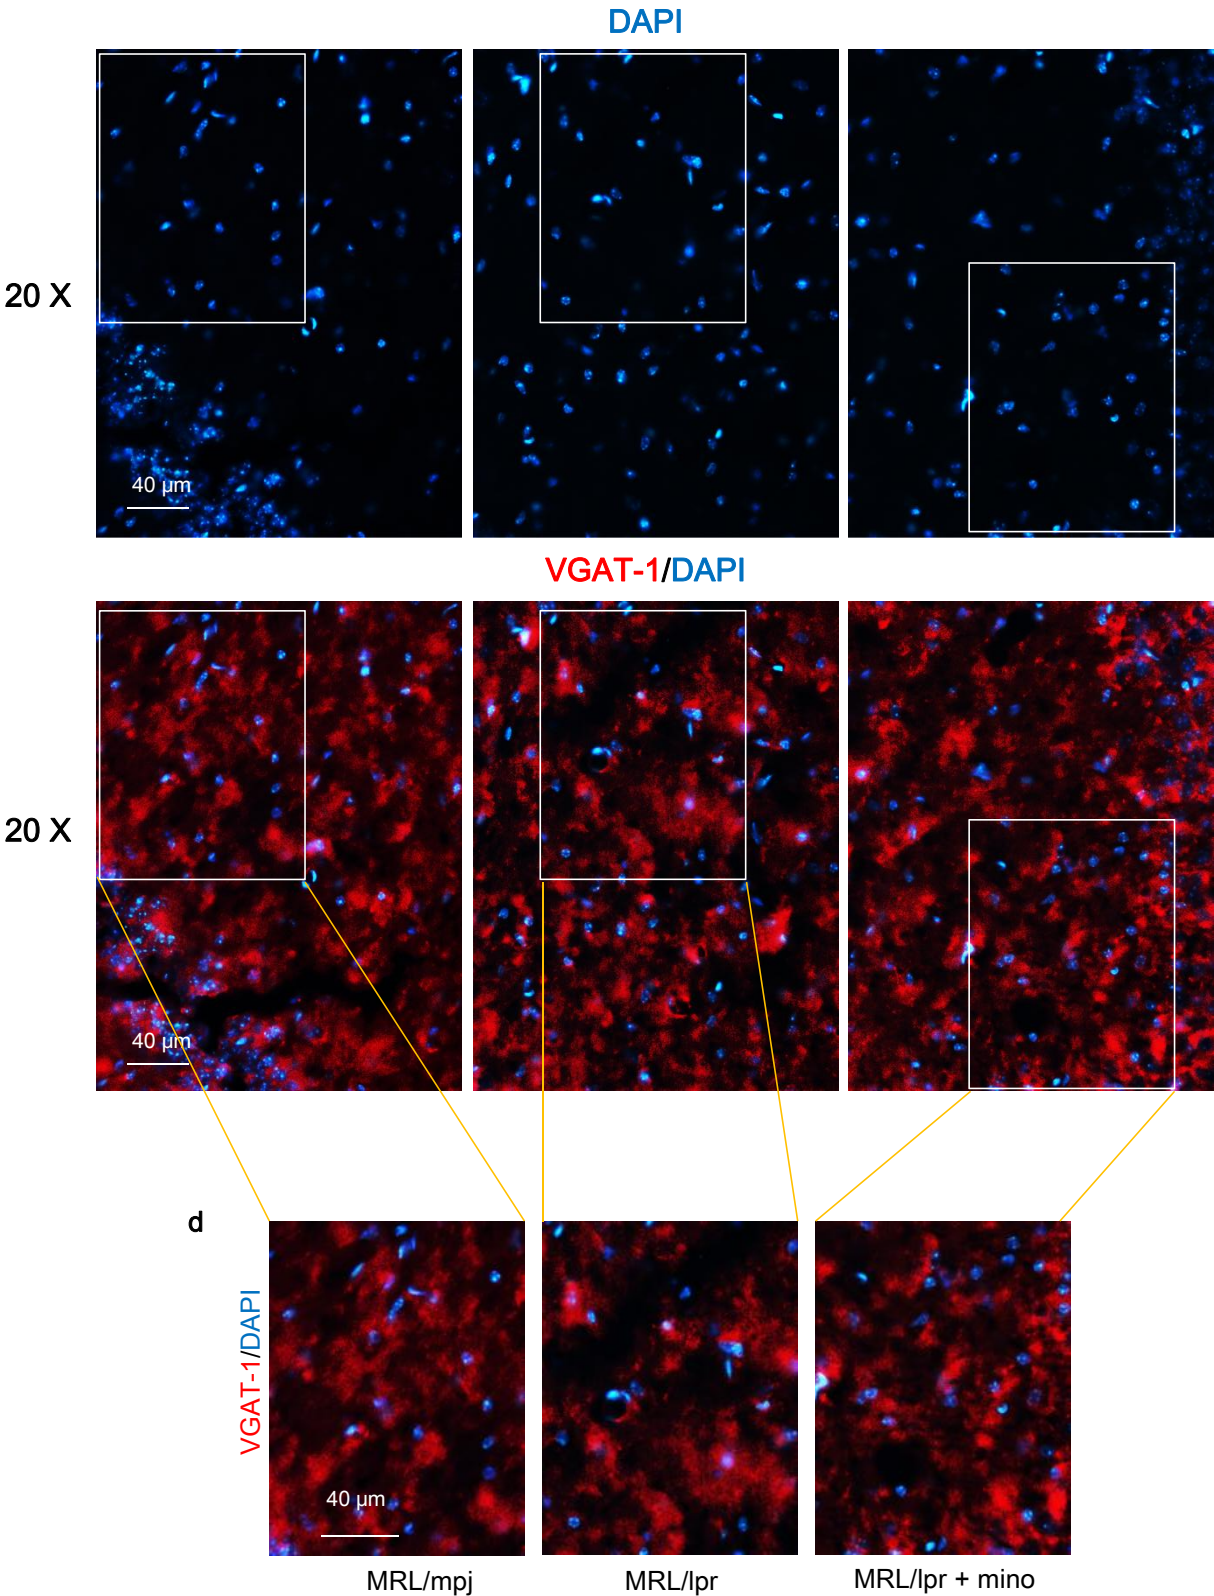

Figure S5e

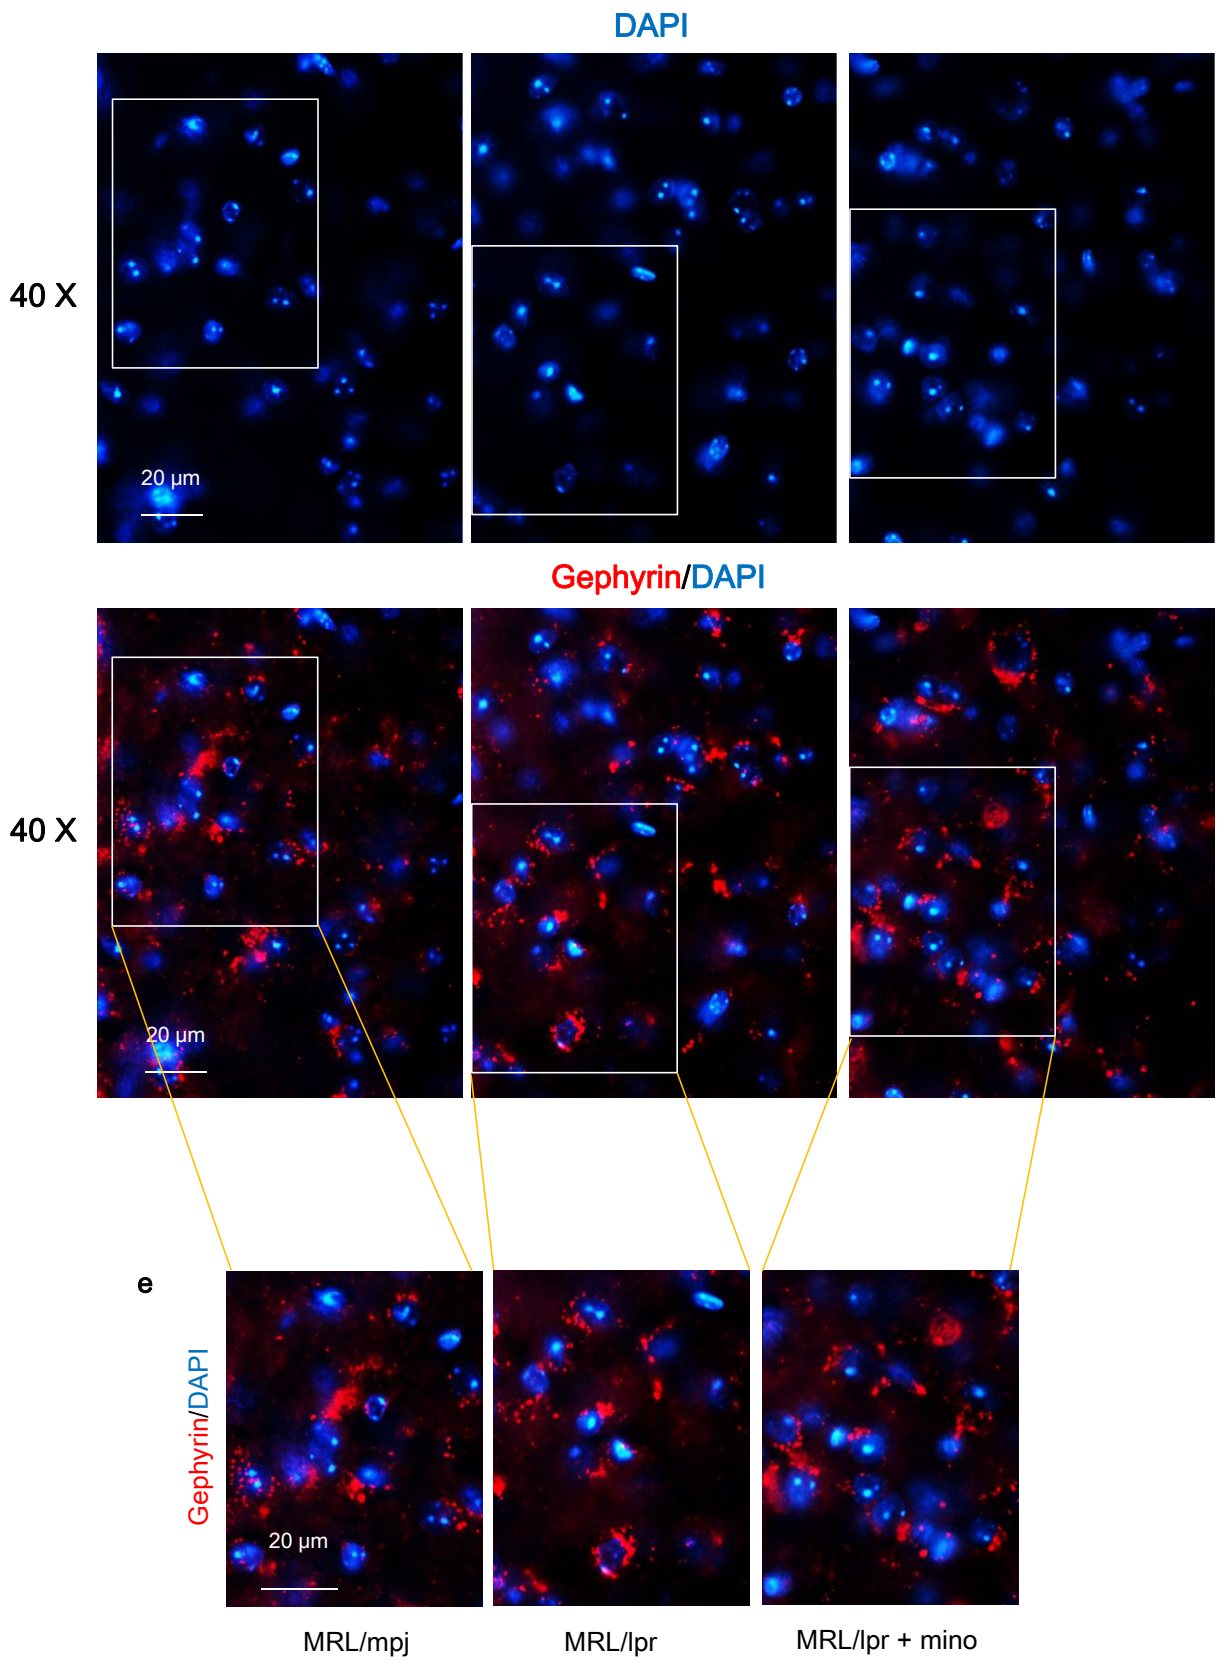



Figure S6g

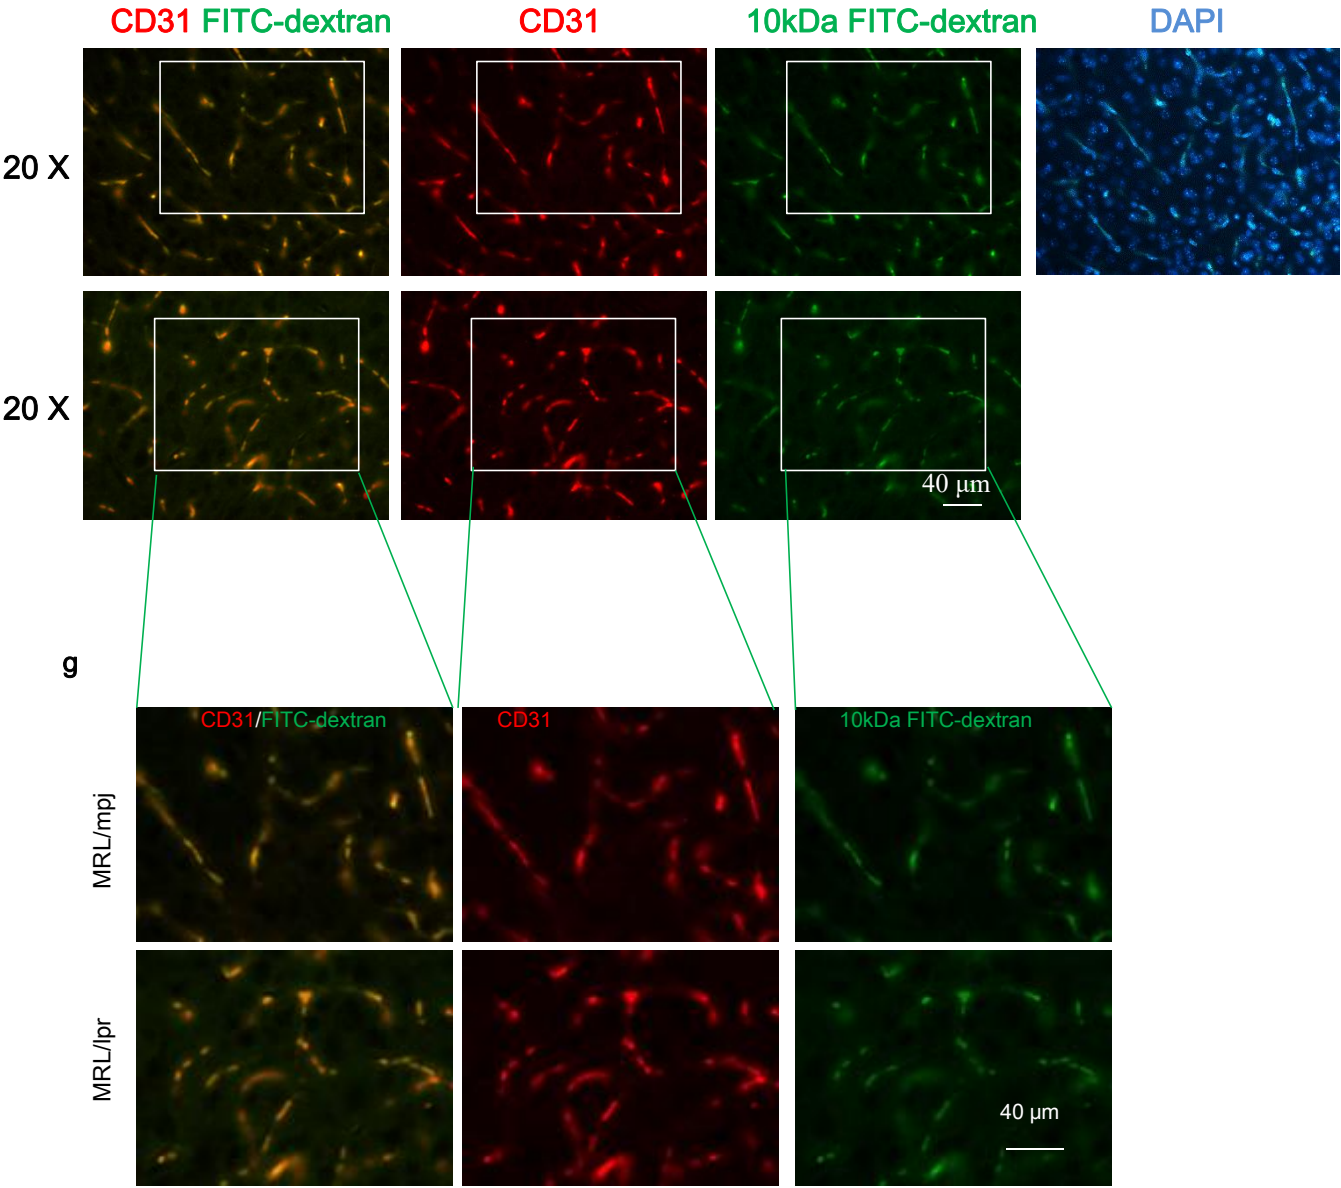

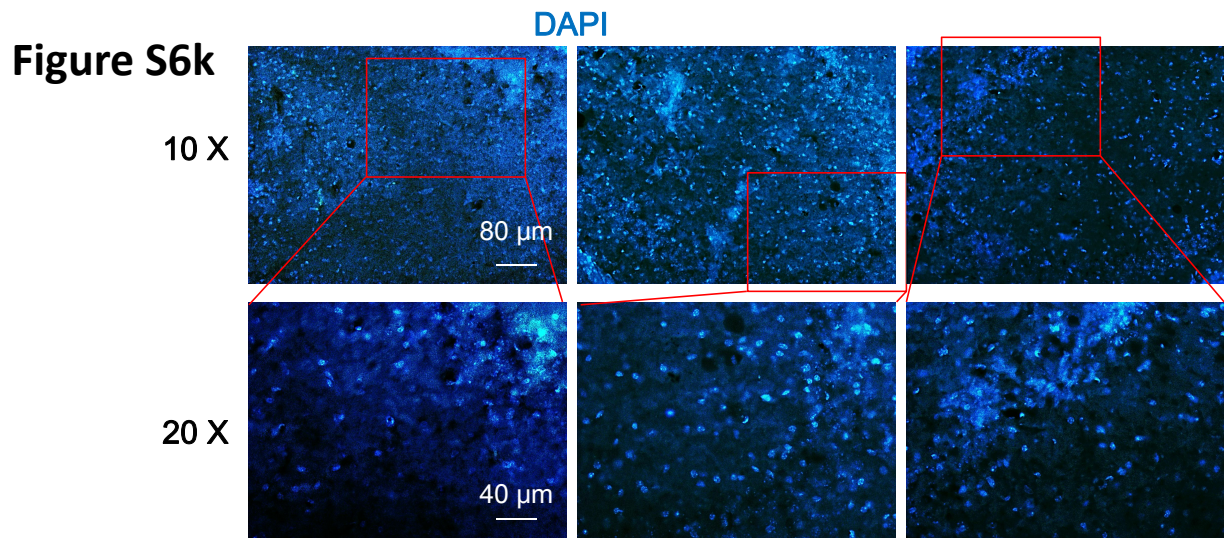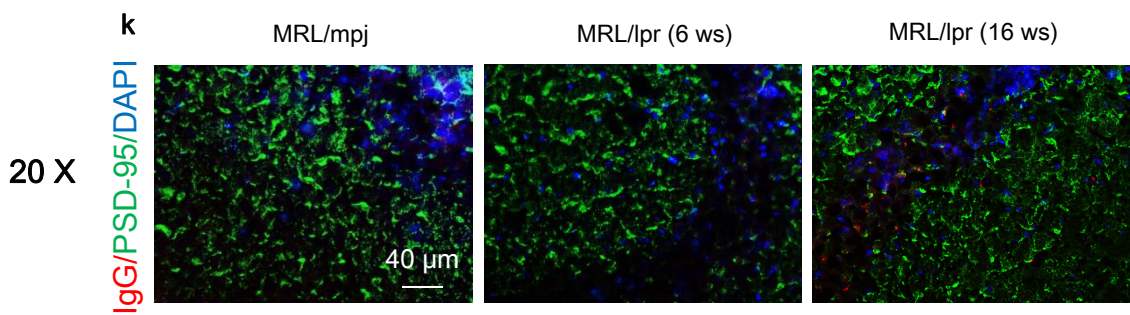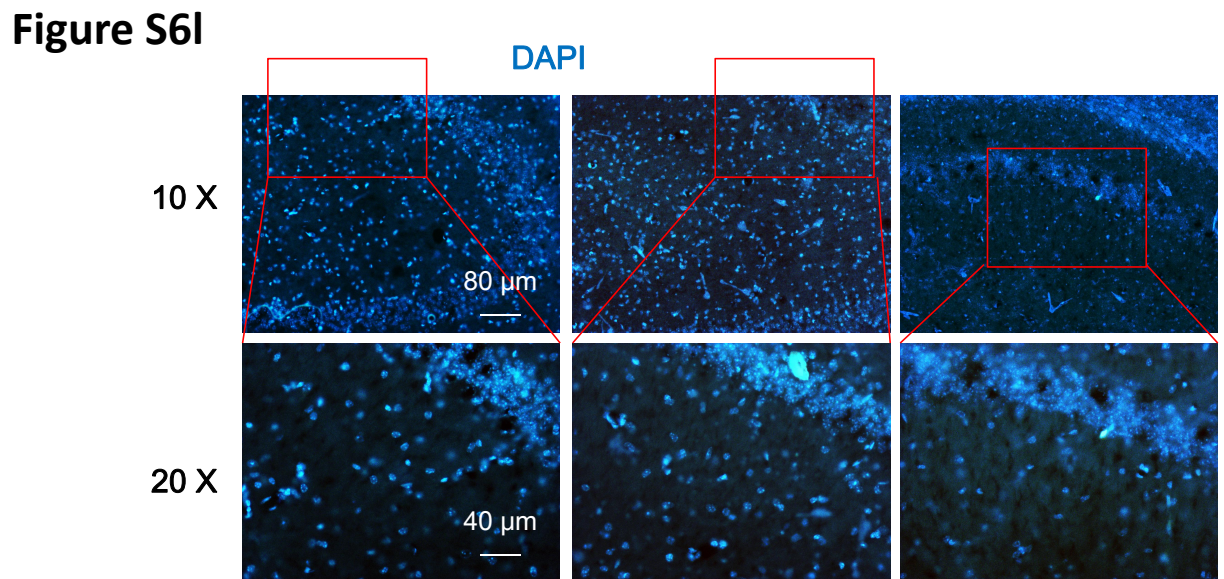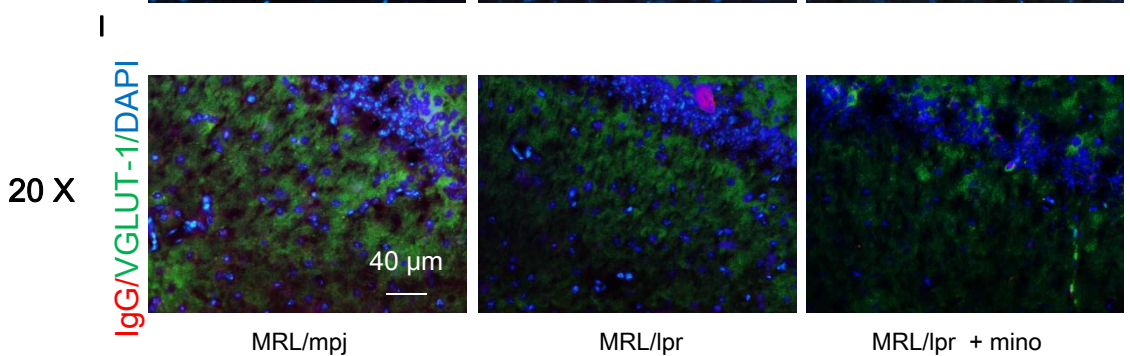

Figure S9c

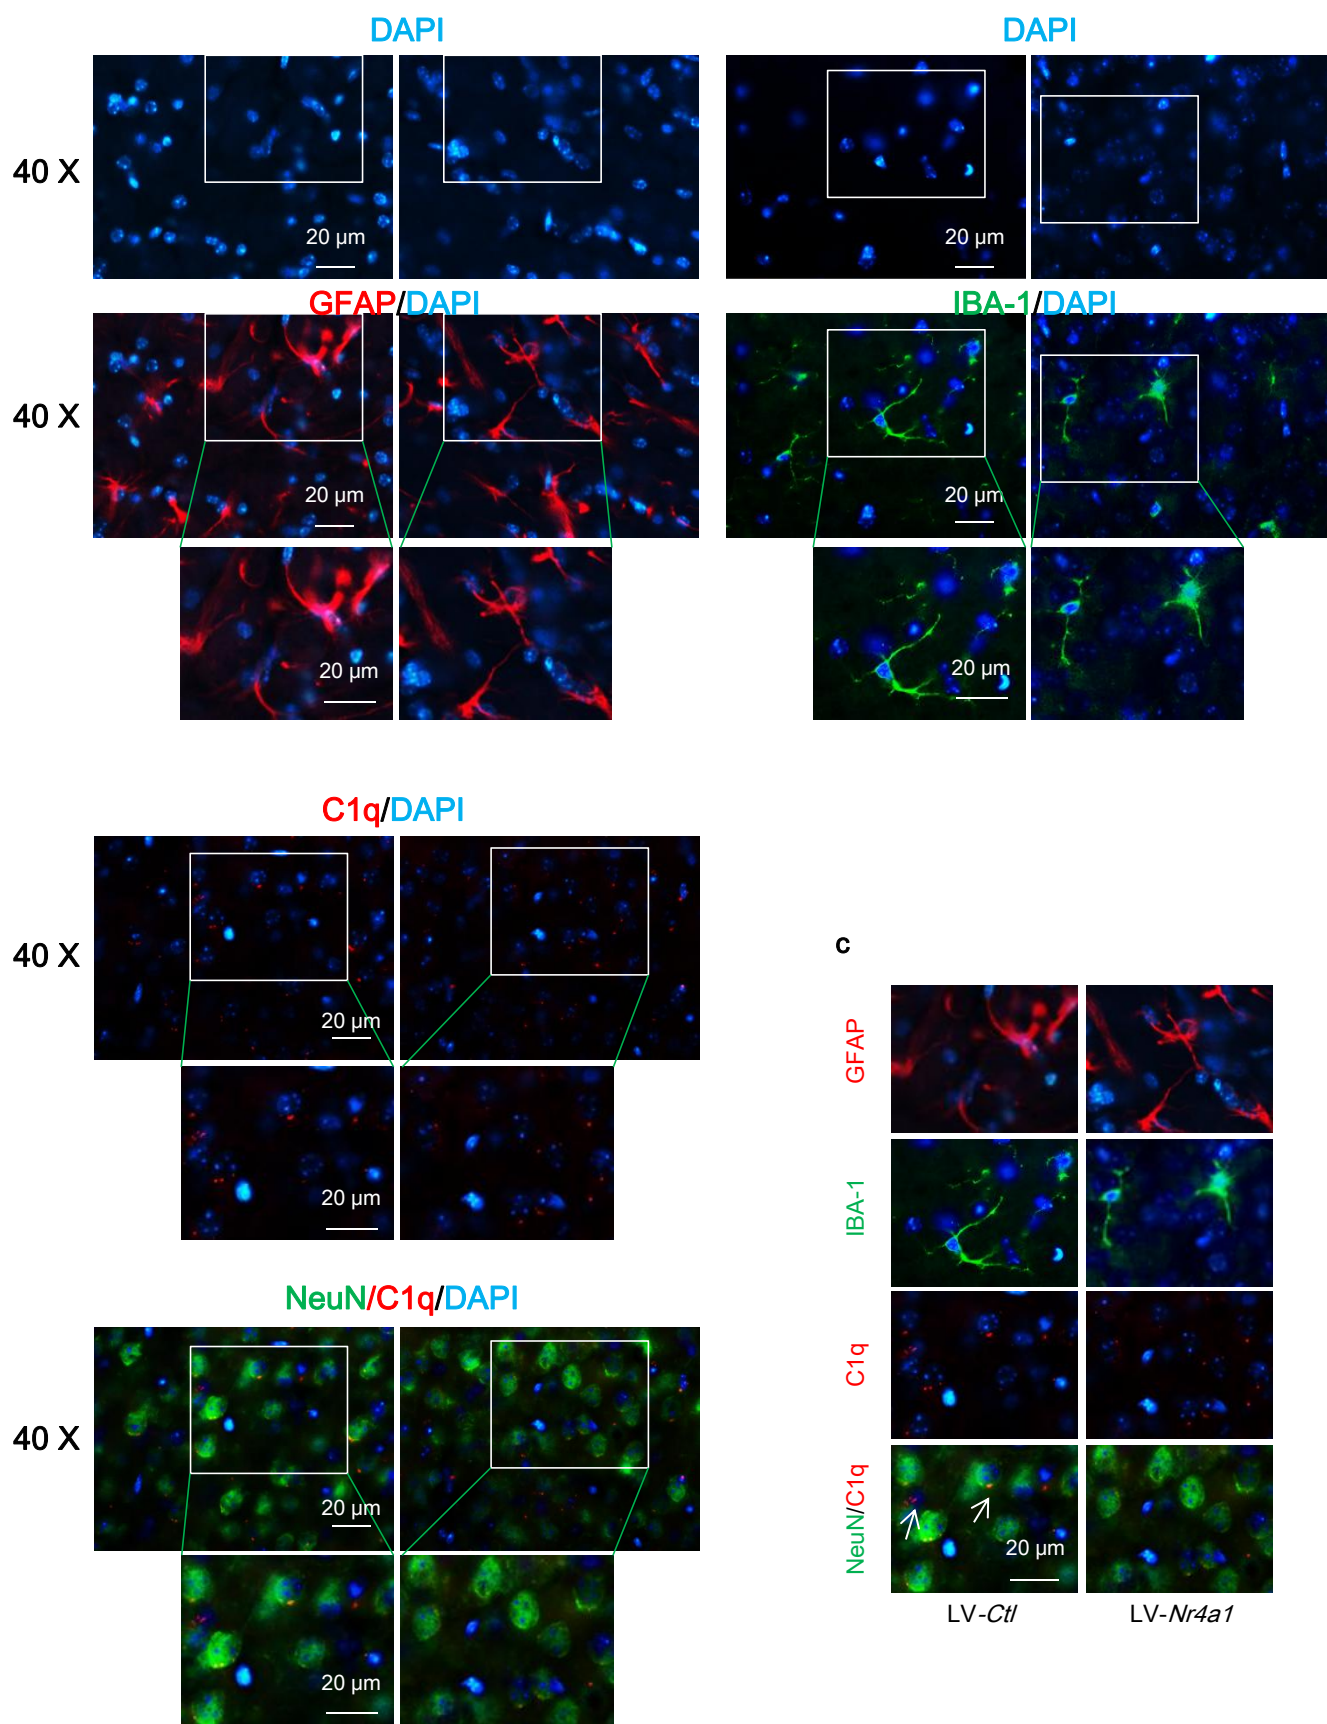

Supplement: 41392_2021_867_MOESM3_ESM.pdf [file 41392_2021_867_MOESM3_ESM.pdf]
